# Supplementary material
Source: PubMed Central journal article supplement (PMC4176620)

**Tables.****Table E1.**

**Mouse miRNAs up-regulated in the Ag-affinity column Eluate (ETX) compared to the Flow Through (FTX) in order of frequency** Flow TNP-Ts Sup (thus anti-TNP) nanovesicles applied to the TNP-Ag linked column and Flow Through (FTX) the column vs eluate TNP-Ts Sup exosome-like nanovesicles binding the column frequencies = number of sequence reads/total reads in the sample; i.e. here, miRNA sequences more frequent in the Eluate vs. the Flow Through.

logConc: overall concentration for a miRNA across the two groups being compared

logFC: log-fold change for the counts between the groups. The p-values were adjusted for multiple testing, using the Benjamini and Hochberg's approach for controlling the false discovery rate (FDR). p value: the exact p-values computed by edgeR.

**Table E2. Mouse miRNAs up-regulated in Ag-affinity column Flow Through (FTX) compared to the Eluate (ETX) in order of frequency.** Shown here are miRNA sequences more frequent in the Flow Through vs the Eluate.

**Supplemental Table 1.** Mouse miRNAs significantly up-regulated in the TNP Ag-affinity column Elute (ETX) compared to the Flow Through (FTX). Log(concentration) indicates the overall concentration for a miRNA across the two groups, Log (fold-change) indicates the log-fold change for the normalized counts (ETX/FTX), P-Value indicates the significance (computed by edgeR) when comparing the concentrations from the ETX and FTX groups, FDR (False Discovery Rate) indicates the P-Value after adjusting for multiple testing using the Benjamini and Hochberg approach, # Reads FTX and EXT indicate the number of reads for each group.

| mmu-mir              | Log (concentration) | Log (fold-change) | P-value  | FDR      | # Reads FTX | # Reads ETX |
|----------------------|---------------------|-------------------|----------|----------|-------------|-------------|
| <b>mmu-mir-92a-1</b> | -12.70              | 5.79              | 1.76E-12 | 3.19E-10 | 60          | 457         |
| mmu-mir-33           | -16.44              | 8.13              | 3.41E-12 | 3.19E-10 | 2           | 77          |
| mmu-mir-27a          | -15.36              | 5.96              | 1.89E-10 | 1.18E-08 | 9           | 77          |
| mmu-mir-484          | -16.19              | 6.00              | 7.51E-10 | 3.51E-08 | 5           | 44          |
| mmu-mir-296          | -31.74              | 36.54             | 5.26E-09 | 1.40E-07 | 0           | 36          |
| mmu-mir-92a-2        | -17.20              | 6.62              | 7.60E-08 | 1.78E-06 | 2           | 27          |
| <b>mmu-mir-150</b>   | -13.11              | 3.69              | 8.95E-07 | 1.67E-05 | 94          | 167         |
| mmu-mir-210          | -17.95              | 7.11              | 1.72E-06 | 2.52E-05 | 1           | 19          |
| mmu-mir-486          | -17.95              | 7.11              | 1.72E-06 | 2.52E-05 | 1           | 19          |
| mmu-let-7b           | -13.83              | 3.54              | 2.94E-06 | 3.67E-05 | 60          | 96          |
| mmu-mir-184          | -32.29              | 35.46             | 5.19E-06 | 6.06E-05 | 0           | 17          |
| <b>mmu-let-7i</b>    | -11.32              | 3.17              | 9.88E-06 | 1.09E-04 | 389         | 479         |
| mmu-mir-423          | -14.17              | 3.39              | 1.15E-05 | 1.19E-04 | 50          | 72          |
| mmu-mir-500          | -32.48              | 35.07             | 4.53E-05 | 4.46E-04 | 0           | 13          |
| mmu-mir-153          | -32.60              | 34.83             | 1.65E-04 | 1.47E-03 | 0           | 11          |
| mmu-mir-328          | -17.78              | 4.28              | 1.01E-03 | 8.55E-03 | 3           | 8           |
| mmu-mir-222          | -16.38              | 3.09              | 1.18E-03 | 9.56E-03 | 12          | 14          |
| mmu-mir-1964         | -32.83              | 34.37             | 1.41E-03 | 1.10E-02 | 0           | 8           |
| mmu-mir-221          | -15.31              | 2.50              | 2.35E-03 | 1.69E-02 | 31          | 24          |
| mmu-mir-339          | -17.42              | 3.54              | 4.07E-03 | 2.53E-02 | 5           | 8           |
| mmu-mir-147          | -33.04              | 33.96             | 6.15E-03 | 3.38E-02 | 0           | 6           |
| mmu-mir-98           | -18.12              | 3.60              | 9.22E-03 | 4.93E-02 | 3           | 5           |

**Supplemental Table 2.** Mouse miRNAs significantly up-regulated in the TNP Ag-affinity column Flow Through (FTX) compared to the Elute (ETX). For column descriptions, please see Supplemental Table 1 caption.

| mmu-mir            | Log<br>(concentration) | Log<br>(fold-change) | P-value  | FDR      | # Reads<br>FTX | # Reads<br>ETX |
|--------------------|------------------------|----------------------|----------|----------|----------------|----------------|
| mmu-mir-29a        | -10.63                 | -4.74                | 9.81E-10 | 3.67E-08 | 9766           | 50             |
| mmu-mir-148a       | -13.75                 | -5.14                | 5.23E-09 | 1.40E-07 | 1288           | 5              |
| mmu-mir-26b        | -12.99                 | -3.90                | 8.93E-07 | 1.67E-05 | 1411           | 13             |
| mmu-mir-148b       | -15.89                 | -5.51                | 1.76E-06 | 2.52E-05 | 333            | 1              |
| mmu-mir-340        | -16.00                 | -5.29                | 2.88E-06 | 3.67E-05 | 285            | 1              |
| mmu-mir-696        | -32.48                 | -35.08               | 1.60E-04 | 1.47E-03 | 95             | 0              |
| mmu-mir-2133-2     | -14.35                 | -2.59                | 1.90E-03 | 1.42E-02 | 350            | 8              |
| mmu-mir-20a        | -15.55                 | -3.01                | 2.47E-03 | 1.71E-02 | 176            | 3              |
| mmu-mir-29c        | -16.74                 | -3.81                | 3.49E-03 | 2.33E-02 | 102            | 1              |
| mmu-mir-191        | -15.03                 | -2.58                | 3.82E-03 | 2.46E-02 | 218            | 5              |
| mmu-mir-712        | -14.49                 | -2.30                | 5.10E-03 | 3.07E-02 | 287            | 8              |
| <b>mmu-mir-155</b> | -33.10                 | -33.83               | 5.48E-03 | 3.10E-02 | 40             | 0              |
| mmu-mir-362        | -33.10                 | -33.83               | 5.48E-03 | 3.10E-02 | 40             | 0              |

# Supplemental Figure 1

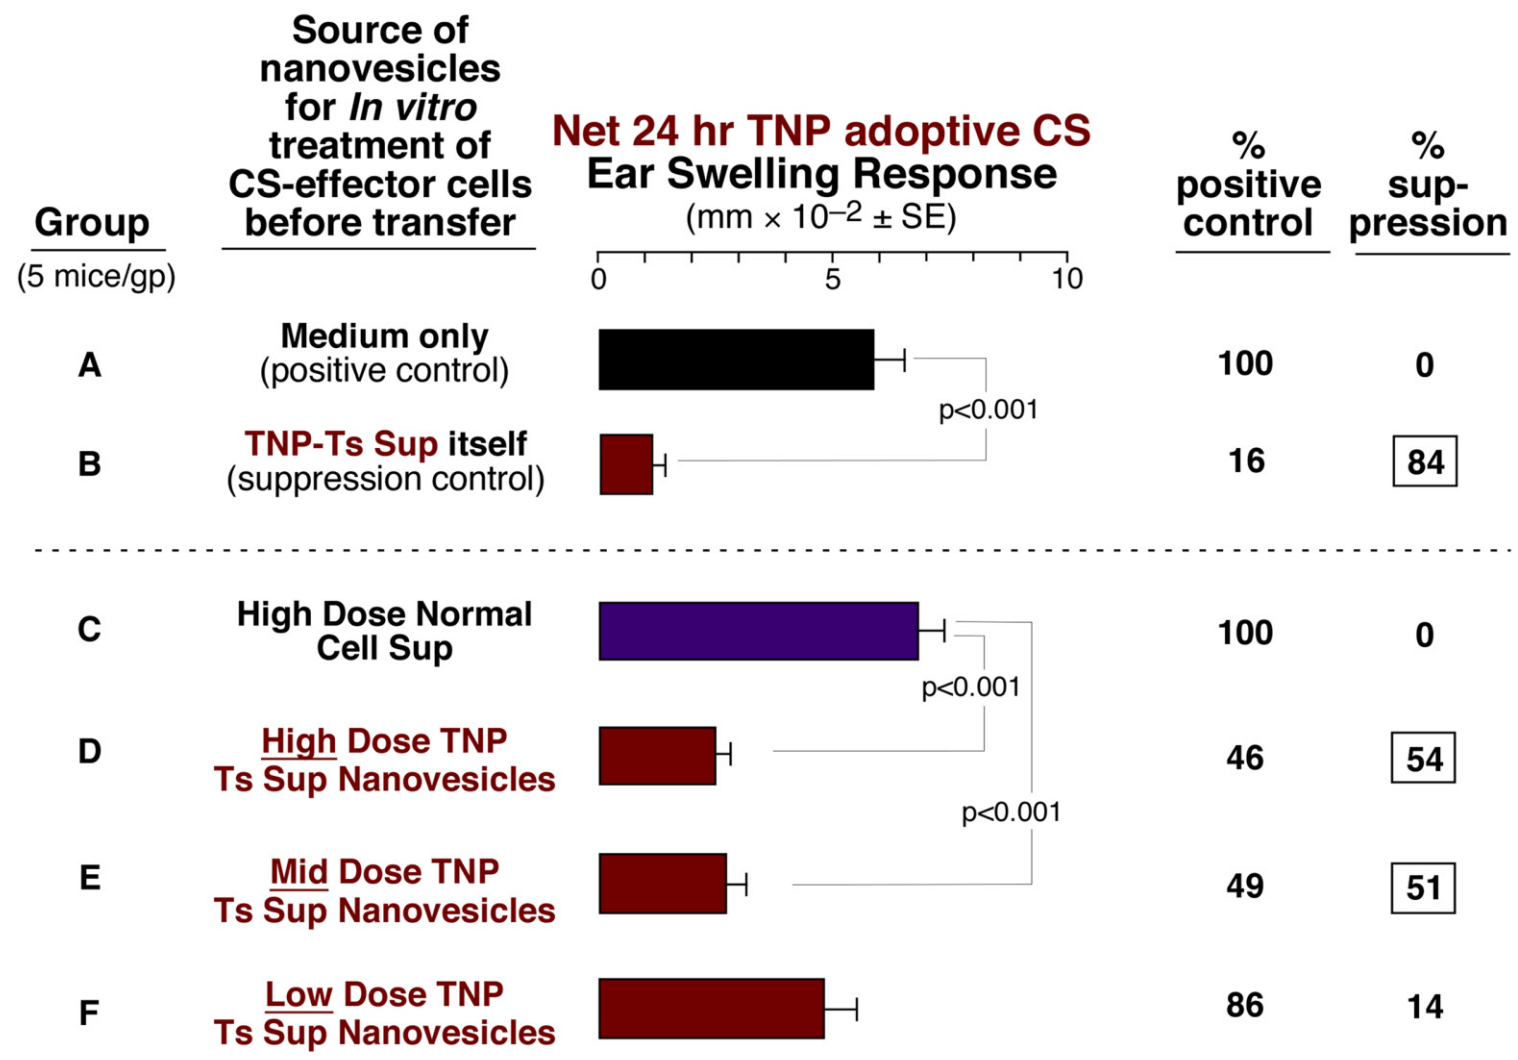

## Supplemental Figure 2

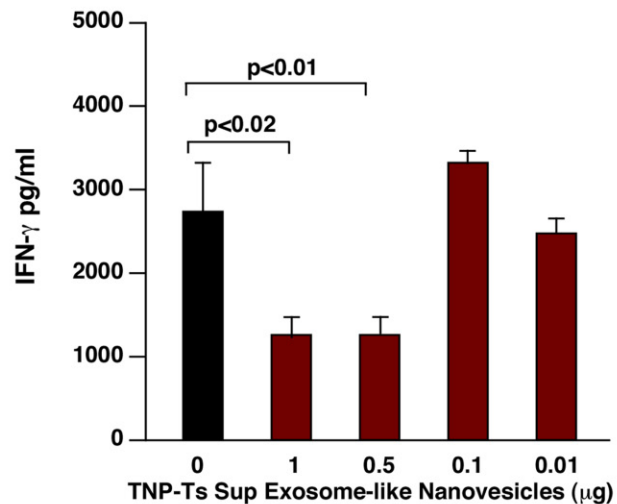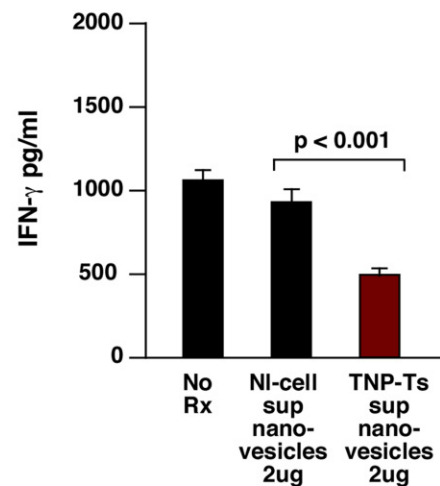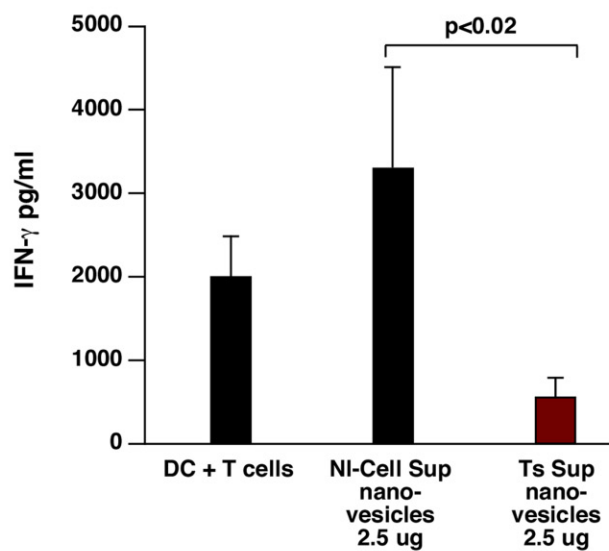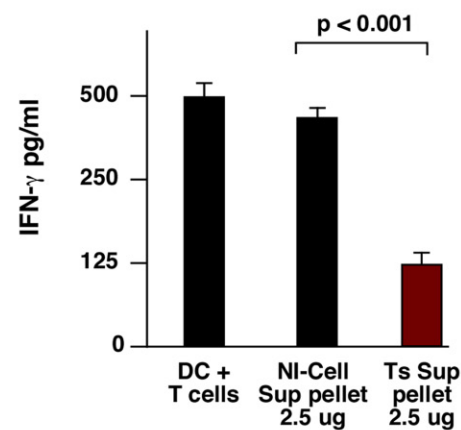

### Supplemental Figure 3

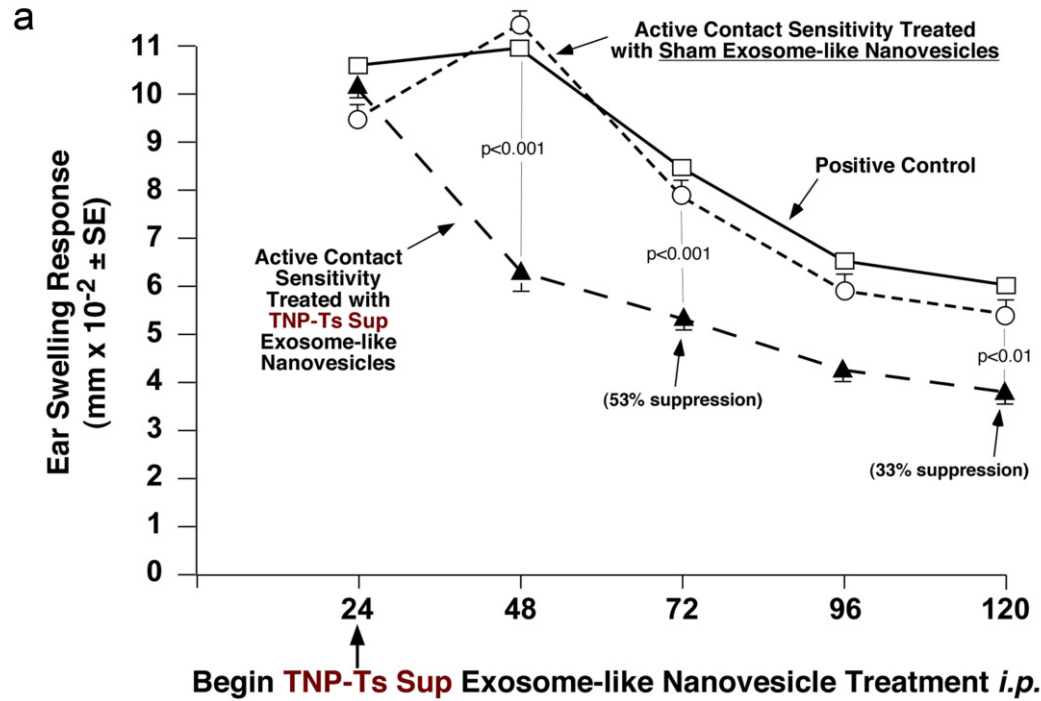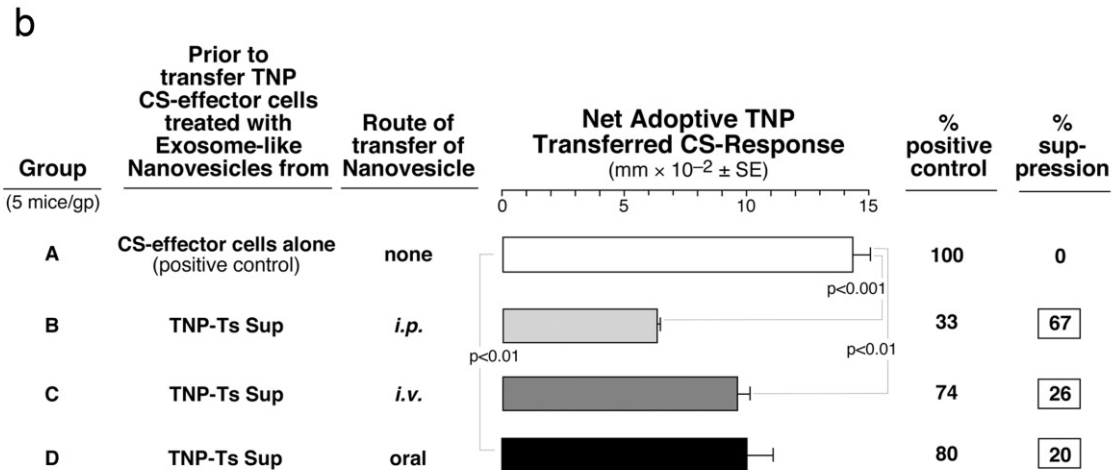

## Supplemental Figure 4

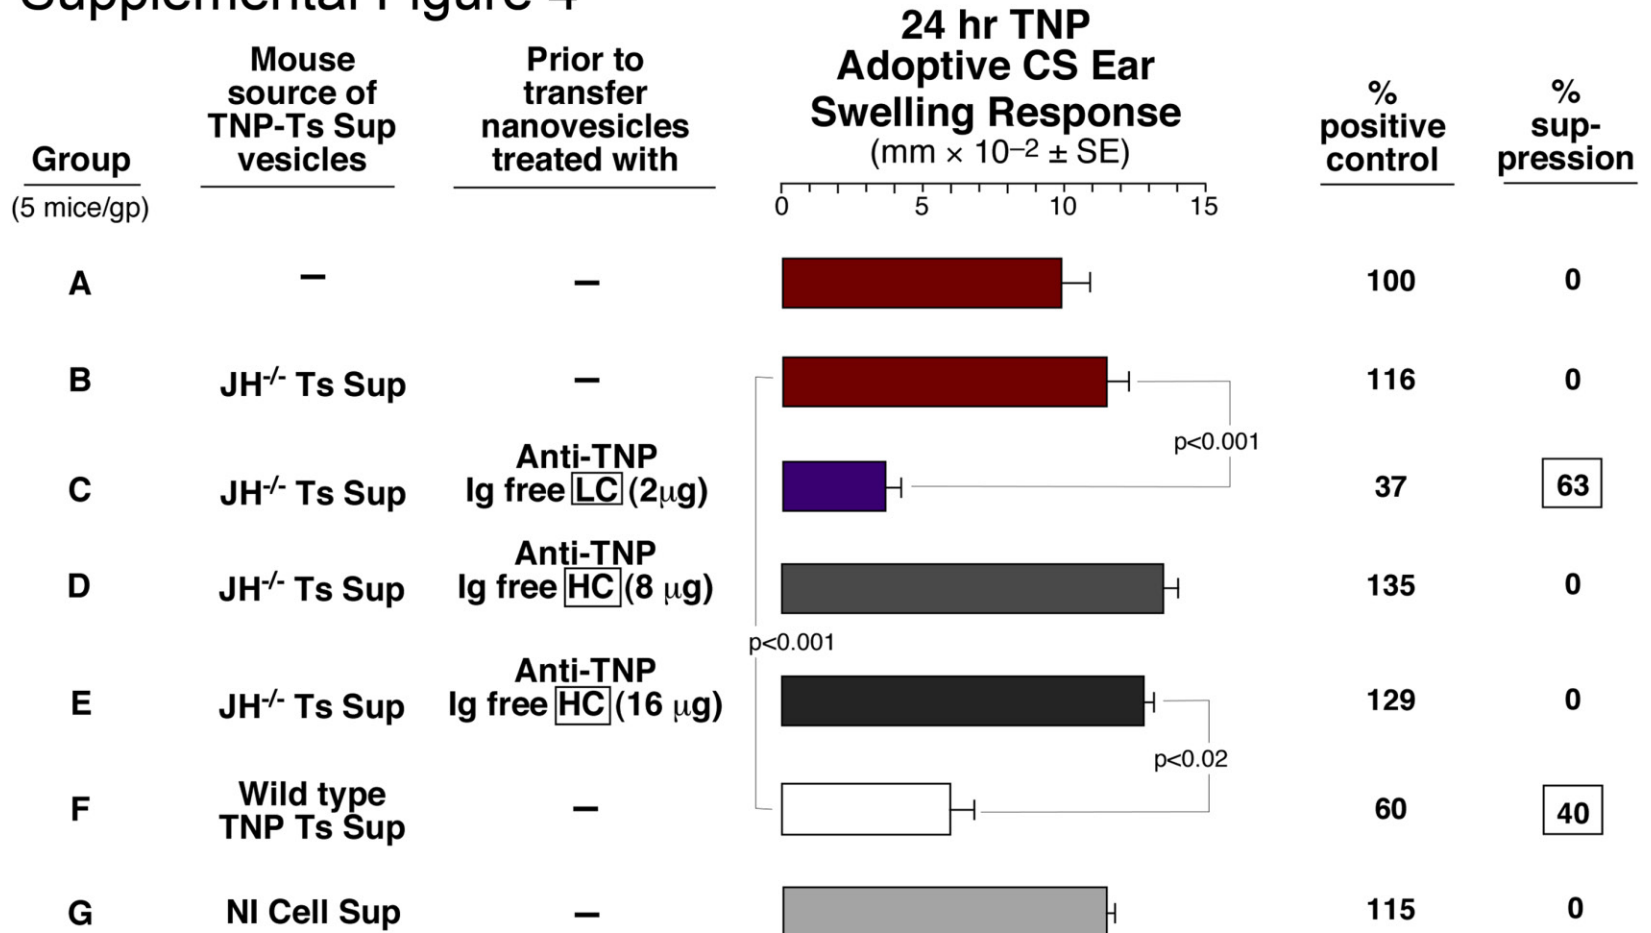

Supplement: NIHMS487340-supplement-supplement_1.pdf [file NIHMS487340-supplement-supplement_1.pdf]
